# Supplementary material for: Photoionization studies of reactive intermediates using synchrotron radiation
Source: Royal Society of Chemistry journal article supplement (doi:10.1039/c9cp00623k), 2019-01-01

## Supplementary Information

### 1. Tables SI1-SI3

**Table SI1** Relative intensities of iodine atoms obtained in this work compared with the work of references 7 and 72.

| $I^+ \leftarrow I(^2P_{3/2})$ bands | Berkowitz and<br>Goodman (72) <sup>(a)</sup> | Ref. 7 <sup>(b)</sup>  | This work,<br>at $h\nu = 21.22$ eV |
|-------------------------------------|----------------------------------------------|------------------------|------------------------------------|
| $^3P_2$                             | 1.00 (1.00)                                  | 1.00 (1.00)            | $1.00 \pm 0.03$                    |
| $^3P_1$                             | 0.34 (0.31)                                  | $0.39 \pm 0.05$ (0.31) | $0.47 \pm 0.03$                    |
| $^3P_0$                             | 0.17 (0.15)                                  | $0.18 \pm 0.03$ (0.15) | $0.25 \pm 0.02$                    |
| $^1D_2$                             | 0.79 (0.57)                                  | $0.80 \pm 0.04$ (0.57) | $0.58 \pm 0.03$                    |
| $^1S_0$                             | 0.06 (0.058)                                 | $0.04 \pm 0.01$ (0.05) | $0.047 \pm 0.005$                  |

<sup>(a)</sup> In reference 72, I atoms were generated by heating solid silver iodide and relative intensities were obtained from a HeI $\alpha$  PE spectrum. The values shown in brackets are relative intensities computed with an intermediate coupling model.

<sup>(b)</sup> In reference 7, I atoms were generated from the F + HI reaction and relative intensities obtained from a HeI $\alpha$  PE spectrum. The values shown in brackets are relative intensities computed with an intermediate coupling model.

**Table SI2** Comparison between the measured positions of the vibrational components of the first two IF PE bands as obtained in PE and TPE spectra.

| $v^+$ | $\text{IF}^+ (\text{X}^2\Pi_{3/2})$ | $\text{IF}^+ (\text{X}^2\Pi_{3/2})$ | $\text{IF}^+ (^2\Pi_{1/2})$ | $\text{IF}^+ (^2\Pi_{1/2})$ |
|-------|-------------------------------------|-------------------------------------|-----------------------------|-----------------------------|
|       | PES                                 | TPES                                | PES                         | TPES                        |
| 0     | $10.539 \pm 0.001$                  | $10.539 \pm 0.001$                  | $11.244 \pm 0.001$          | $11.245 \pm 0.001$          |
| 1     | $10.625 \pm 0.001$                  | $10.625 \pm 0.002$                  | $11.329 \pm 0.001$          | $11.333 \pm 0.001$          |
| 2     | $10.709 \pm 0.001$                  | $10.709 \pm 0.002$                  | $11.413 \pm 0.001$          | $11.413 \pm 0.001$          |
| 3     | $10.792 \pm 0.003$                  | $10.793 \pm 0.002$                  | $11.497 \pm 0.002$          | $11.496 \pm 0.002$          |

**Table SI3**

Energy of resonances converging to the  $\text{I}^+(^1\text{S}_0)$  threshold at 14.109 eV, recorded in CIS spectra for the fourth,  $\text{I}^+(^1\text{D}_2) \leftarrow \text{I}(^2\text{P}_{3/2})$ , band of iodine atoms at  $\theta = 54^\circ 44'$ . Also shown, are the effective and principal quantum numbers,  $n^*$  and  $n$ , the fitting parameters,  $q$ ,  $\Gamma$ ,  $\rho^2$  and the  $\Gamma n^{*3}$  for each Rydberg state.

(i) ns  $[0] \frac{1}{2}$  series

| $E_n/\text{eV}$       | $n^*$              | $n$ | $q$                 | $\Gamma/\text{meV}$ | $\Gamma n^{*3}$    |
|-----------------------|--------------------|-----|---------------------|---------------------|--------------------|
| 13.261<br>$\pm 0.001$ | 4.00<br>$\pm 0.01$ | 8   | -1.19<br>$\pm 0.18$ | 10.2<br>$\pm 0.8$   | 0.66<br>$\pm 0.10$ |
| 13.575<br>$\pm 0.001$ | 5.05<br>$\pm 0.01$ | 9   | -0.92<br>$\pm 0.24$ | 6.8<br>$\pm 1.4$    | 0.88<br>$\pm 0.18$ |
| 13.744<br>$\pm 0.001$ | 6.10<br>$\pm 0.03$ | 10  | -0.77<br>$\pm 0.23$ | 5.4<br>$\pm 1.3$    | 1.24<br>$\pm 0.29$ |

|             |            |    |            |           |            |
|-------------|------------|----|------------|-----------|------------|
| 13.839      | 7.10       | 11 | -2.99      | 7.6       | 2.71       |
| $\pm 0.001$ | $\pm 0.04$ |    | $\pm 1.62$ | $\pm 2.4$ | $\pm 0.87$ |
| 13.905      | 8.17       | 12 | -0.68      | 5.3       | 2.89       |
| $\pm 0.001$ | $\pm 0.07$ |    | $\pm 0.22$ | $\pm 1.4$ | $\pm 0.79$ |
|             |            |    |            |           |            |

(i) nd  $[2]_{5/2,3/2}$  series

| $E_n/\text{eV}$ | $n^*$      | $n$ | $q$        | $\Gamma/\text{meV}$ | $\Gamma n^{*3}$ |
|-----------------|------------|-----|------------|---------------------|-----------------|
|                 |            |     |            |                     |                 |
| 13.060          | 3.60       | 6   | -1.93      | 24.9                | 1.16            |
| $\pm 0.001$     | $\pm 0.01$ |     | $\pm 0.38$ | $\pm 2.8$           | $\pm 0.14$      |
| 13.472          | 4.62       | 7   | -1.42      | 8.9                 | 0.88            |
| $\pm 0.001$     | $\pm 0.01$ |     | $\pm 0.24$ | $\pm 1.6$           | $\pm 0.16$      |
| 13.685          | 5.66       | 8   | -1.43      | 8.9                 | 1.61            |
| $\pm 0.001$     | $\pm 0.02$ |     | $\pm 0.24$ | $\pm 1.6$           | $\pm 0.28$      |
| 13.806          | 6.70       | 9   | -1.56      | 6.8                 | 2.05            |
| $\pm 0.001$     | $\pm 0.04$ |     | $\pm 0.34$ | $\pm 1.4$           | $\pm 0.46$      |
| 13.880          | 7.71       | 10  | -1.70      | 8.4                 | 3.85            |
| $\pm 0.001$     | $\pm 0.06$ |     | $\pm 0.71$ | $\pm 2.3$           | $\pm 1.08$      |
| 13.930          | 8.72       | 11  | -4.09      | 10.5                | 6.97            |
| $\pm 0.001$     | $\pm 0.08$ |     | $\pm 1.97$ | $\pm 2.9$           | $\pm 1.96$      |
|                 |            |     |            |                     |                 |

2. Figures SI1-SI9

Figure SI1

A schematic potential energy diagram for non-resonant ionization.

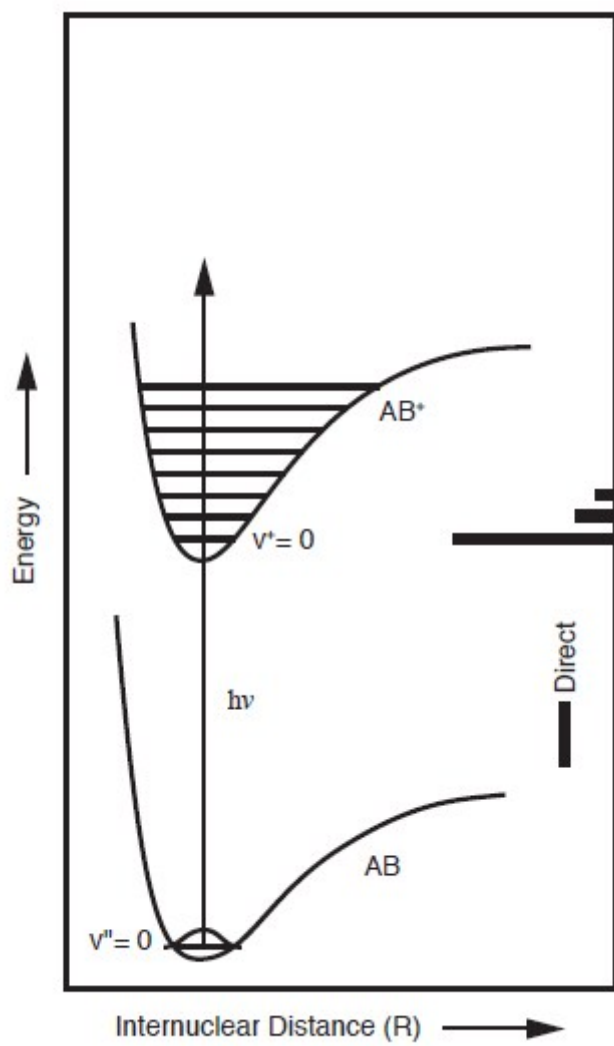

**Figure SI2**

Phase-sensitive detection HeI photoelectron spectrum recorded for discharged oxygen. The discharge is pulsed and a phase sensitive detection method is used. Features above the horizontal baseline are in-phase with the discharge and features below are out-of-phase with the discharge. Hence the features above the baseline correspond to discharge products. (Reproduced from ref.(29) with permission of AIP Publishing).

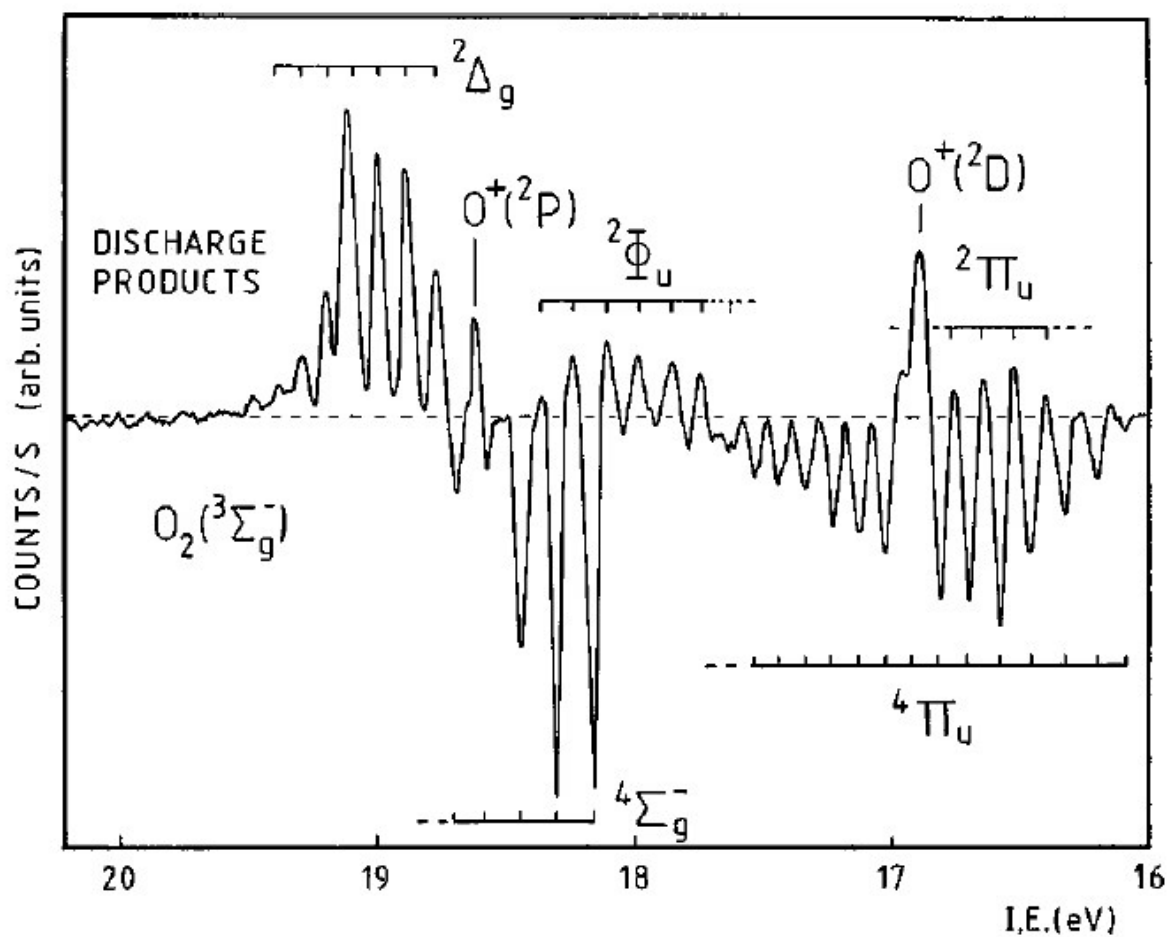

**Figure SI3**

Photoelectron spectra recorded at  $h\nu = 14.11$  eV (i.e. at the position of band A in Fig. 5) for discharged and undischarged oxygen, in the ionization energy region 11.0–14.1 eV. The black circles in the lower part of this figure represent relative vibrational intensities obtained by summing the direct and autoionization computed envelopes. (see the text; reproduced from ref.(29) with permission of AIP Publishing).

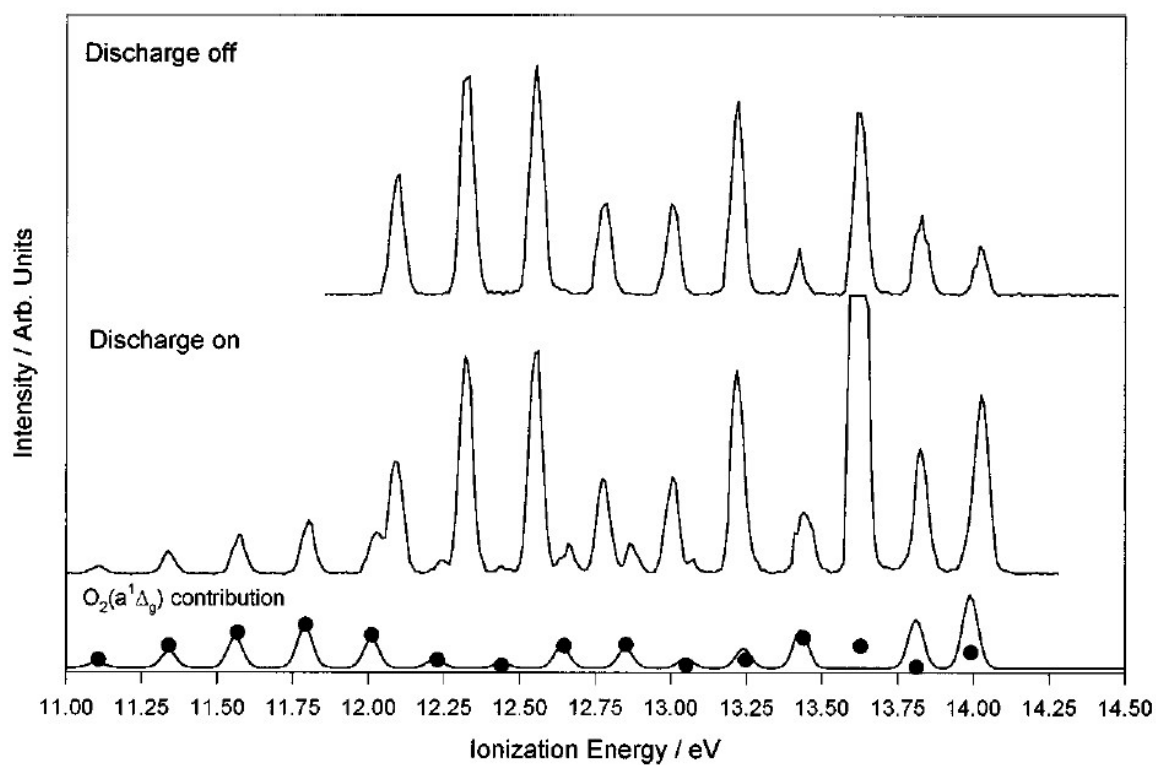

**Figure SI4**

Asymmetry parameter plots for the  $O_2^+ (X^2\Pi_g, v^+ = 0, 1, 2, 3) \leftarrow O_2 (a^1\Delta_g, v'' = 0)$   $O_2$  ionization processes recorded in the photon energy range 13.8-15.2 eV.

The symbols indicate the  $\beta$  parameters obtained from PE spectra for:-

○  $v^+=0$ ; ■  $v^+=1$ ; □  $v^+=2$ ; ●  $v^+=3$ . The vertical bar represents a typical error.

(Reproduced from ref.(31) with permission of AIP Publishing).

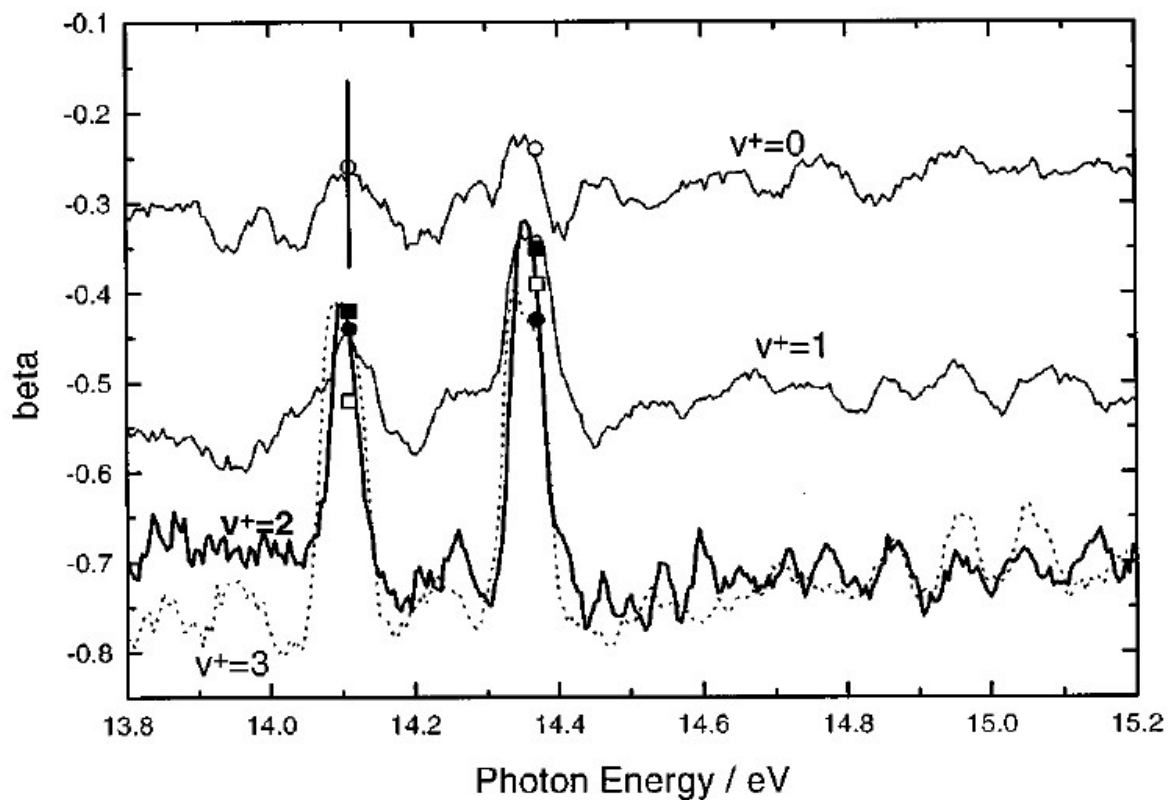

**Figure SI5**

UV photoelectron spectrum recorded at a photon energy of 21.0 eV for a microwave discharge of a flowing mixture of hexafluoropropene,  $C_3F_6$ , in argon. Spectra obtained under these conditions show that all the  $C_3F_6$  is destroyed and converted into  $CF_2$  and  $C_2F_4$  (Reproduced from ref.(39) with permission from Wiley-VCH Verlag GmbH & Co. KGaA).

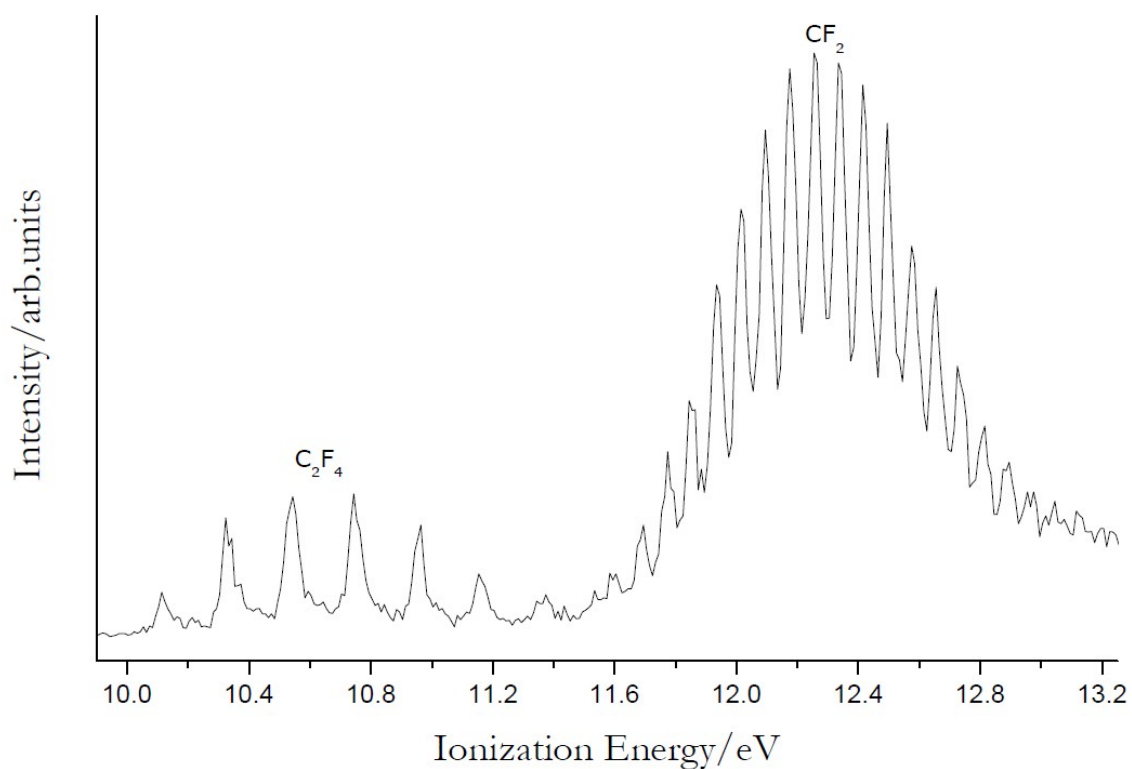



**Figure SI6**

TPE spectrum recorded for a flowing  $\text{CF}_2$  and Ar mixture in the 11.3-13.2 eV photon energy region (upper). Simulated  $\text{CF}_2^+$  ( $X^2A_1$ )  $\leftarrow$   $\text{CF}_2(X^1A_1)$  photoelectron spectrum for 0 K Boltzmann vibrational temperature (lower). (Reproduced from ref.(39) with permission from Wiley-VCH Verlag GmbH & Co. KGaA).

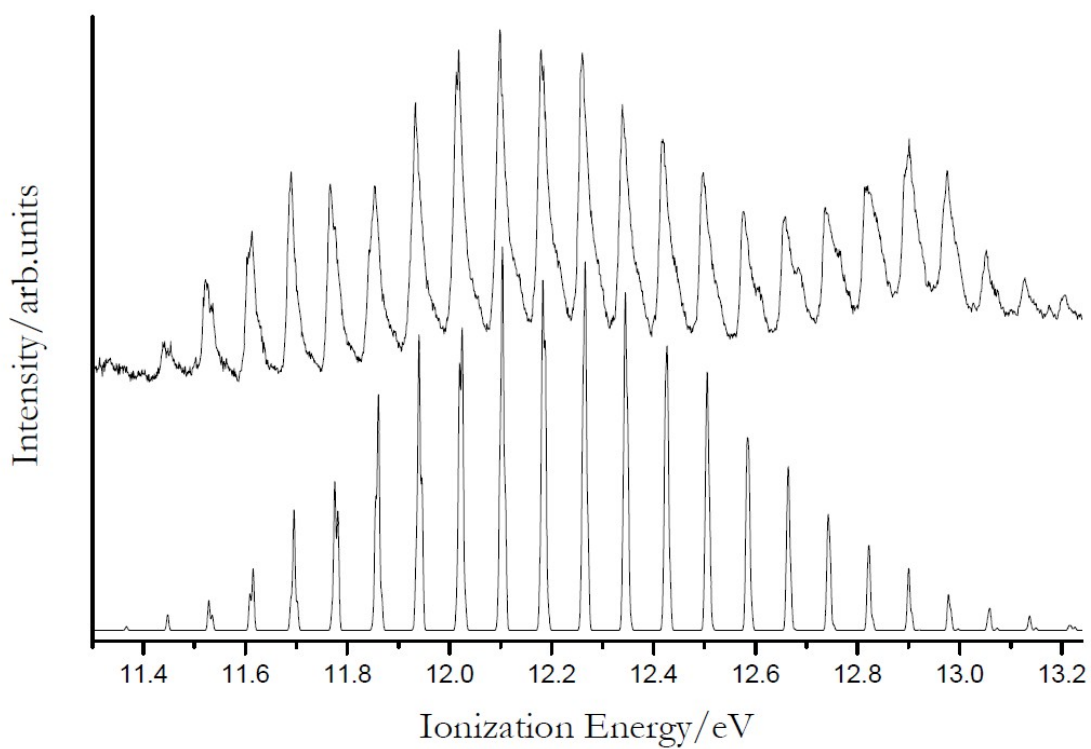

**Figure SI7**

TPE spectrum recorded for a flowing  $\text{CF}_2$  and Ar mixture in the 11.3-13.2 eV photon energy region (upper). Simulated  $\text{CF}_2^+$  ( $X^2A_1$ )  $\leftarrow$   $\text{CF}_2(X^1A_1)$  photoelectron spectrum for 600 K Boltzmann vibrational temperature (lower). (Reproduced from ref.(39) with permission from Wiley-VCH Verlag GmbH & Co. KGaA).

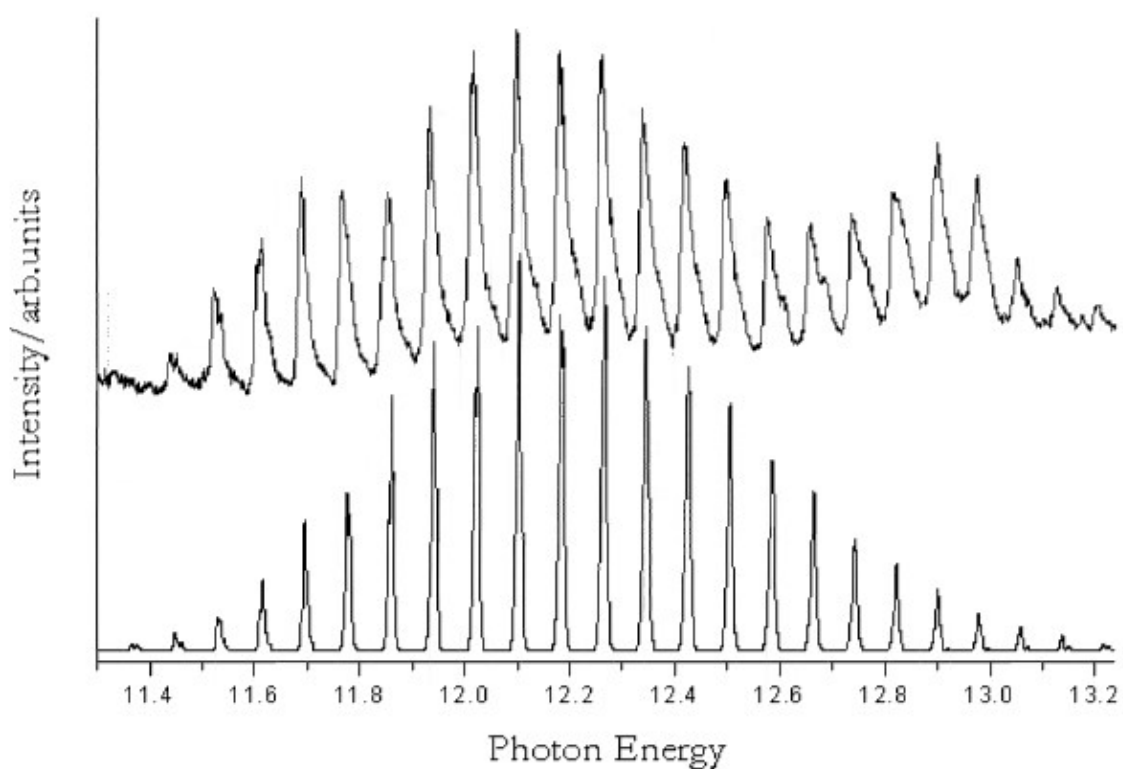

**Figure S18**

Relative intensities obtained for the IF components in the  $\text{IF}^+(X^2\Pi_{3/2}) \leftarrow \text{IF}(X^1\Sigma)$  PE band.

(Reproduced from ref.(23) with permission of ACS Publishing).

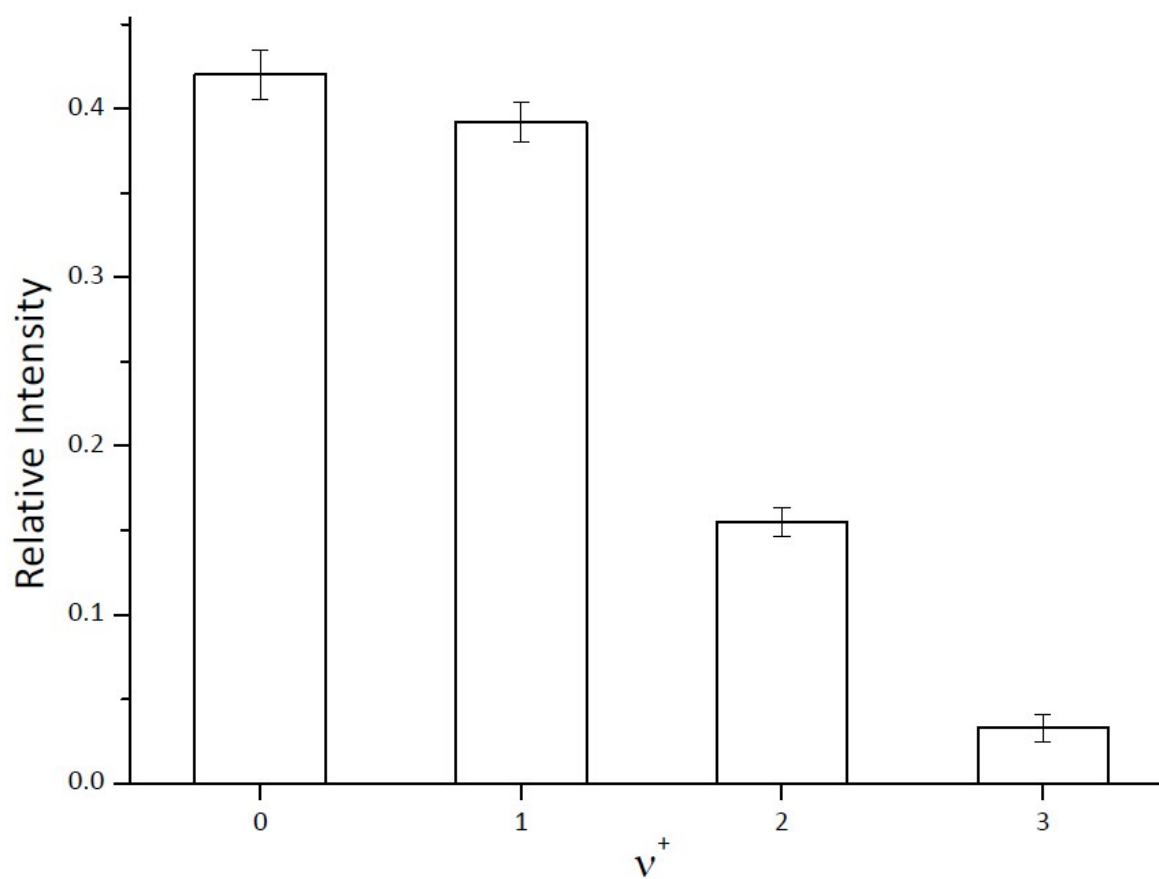

**Figure SI9**

Relative intensities obtained for the IF components in the  $\text{IF}^+(\text{}^2\Pi_{1/2}) \leftarrow \text{IF}(\text{}^1\Sigma)$  PE band.

(Reproduced from ref.(23) with permission of ACS Publishing).

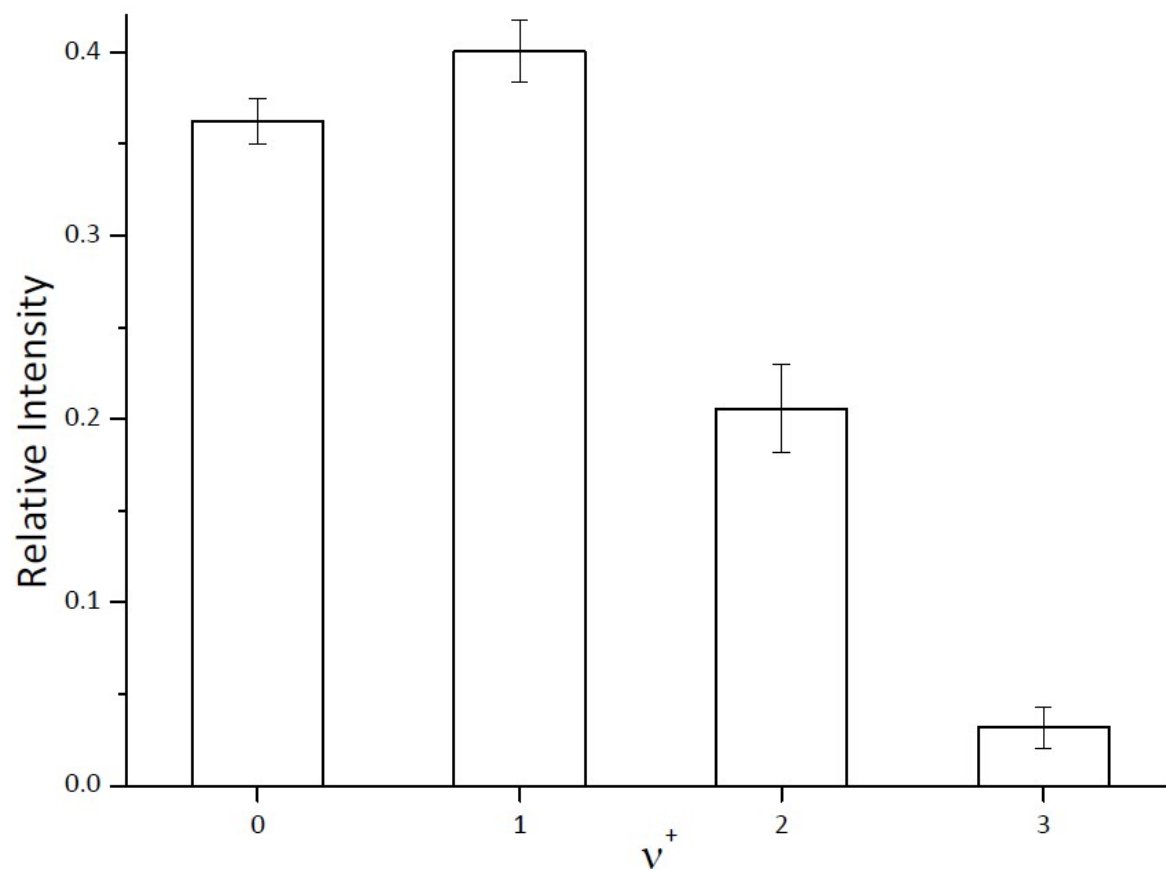

### Figure SI10

CIS spectra of the fourth PE band of iodine atoms ( $I^+(^1D_2) \leftarrow I(^2P_{3/2})$ ) recorded at an angles of (a)  $\theta = 0^\circ$  and (b)  $\theta = 54^\circ 44'$  in the photon energy region 12.9 to 14.1 eV, showing autoionizing resonances converging to the  $I^+(^1S_0)$  threshold at 14.109 eV. (Reproduced from ref.(40) with permission of AIP Publishing).

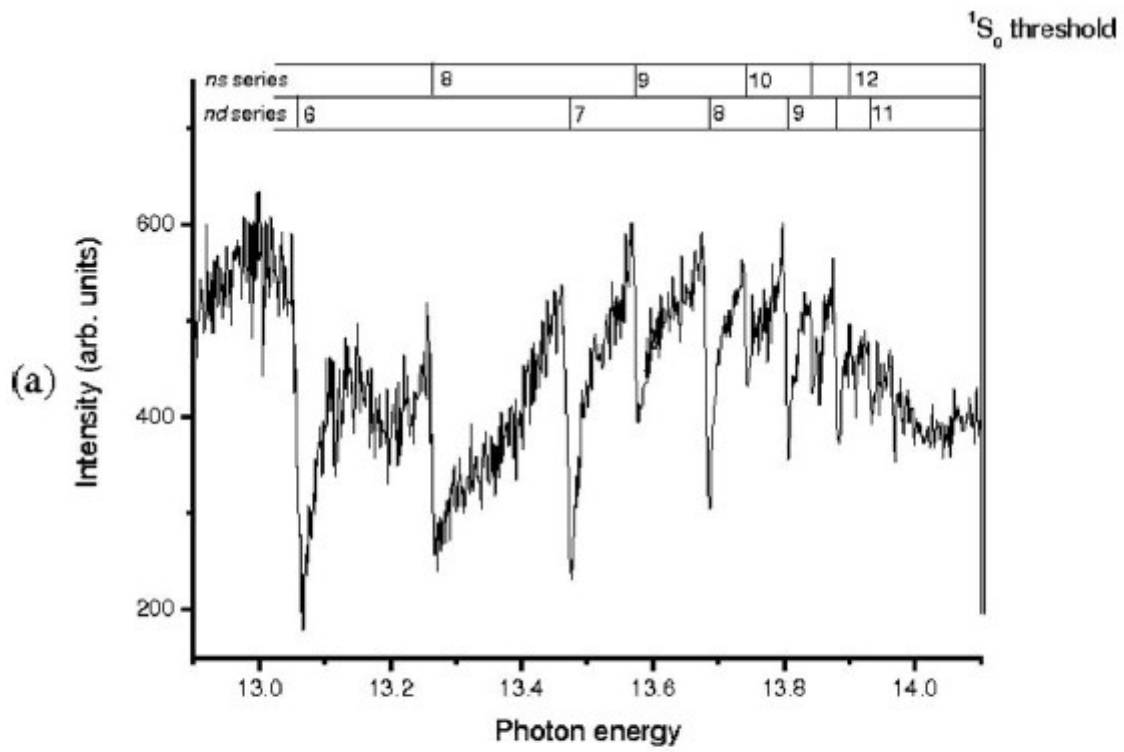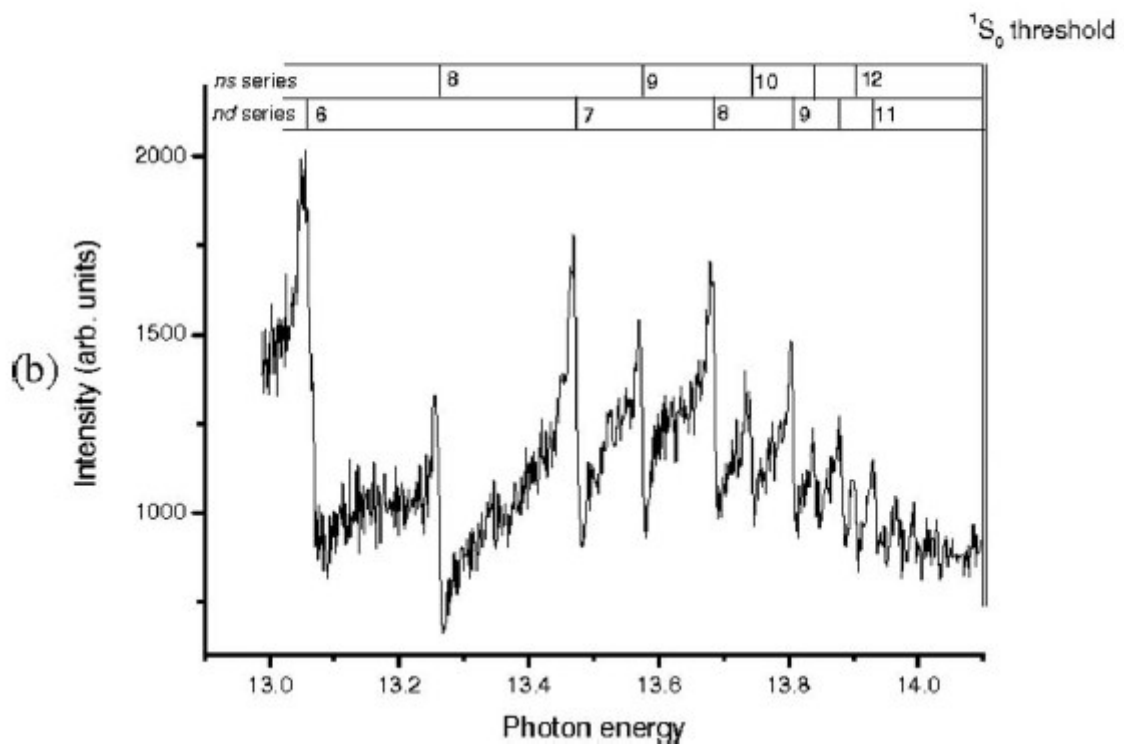

Supplement: c9cp00623k1.pdf [file c9cp00623k1.pdf]
